# Supplementary material for: Less Reactive Thiol Ligands: Key towards Highly Mucoadhesive Drug Delivery Systems
Source: MDPI journal article supplement (doi:10.3390/polym12061259), 2020-05-30
Supplement: s1 [file s1]

Supplementary Data

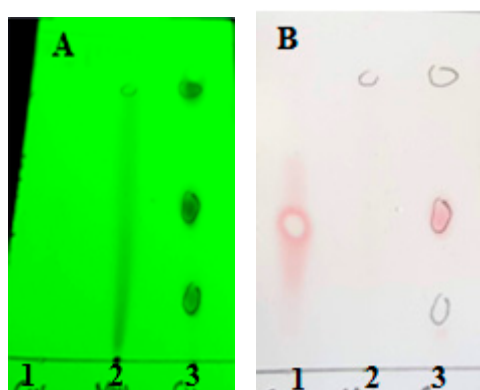

**Figure S1.** TLC of Cys-MNA disulfide; (A) under UV, (B) ninhydrin spray; (1) Cys, (2) MNA and (3) reaction mixture.

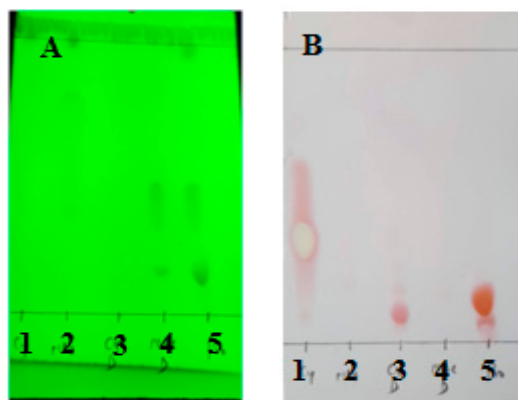

**Figure S2.** TLC of Cys-NAC disulfide; (A) under UV, (B) ninhydrin spray; (1) Cys, (2) Cys dimer, (3) NAC, (4) NAC dimer and (5) reaction mixture.

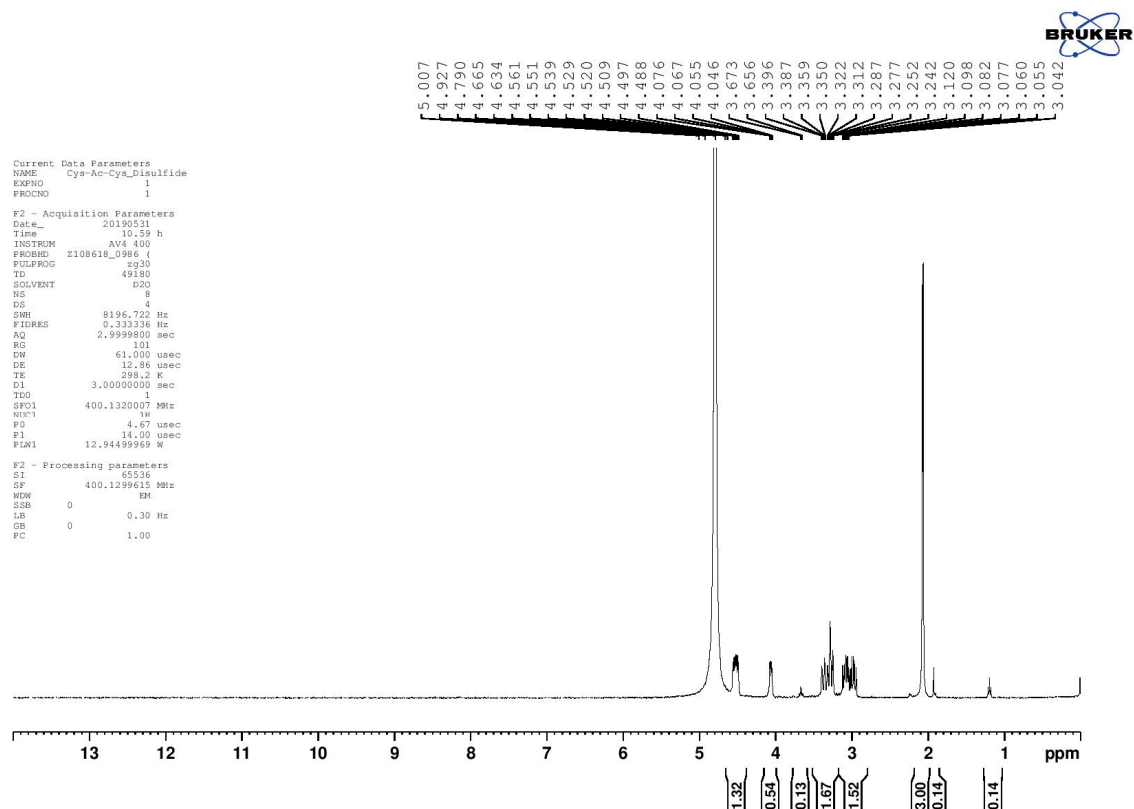

Figure S3.  $^1\text{H}$ -NMR spectrum of Cys-NAC

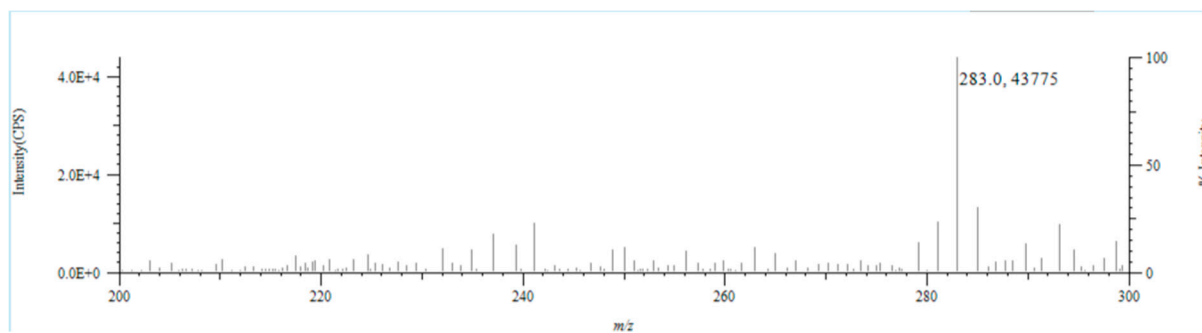

Figure S4. Mass spectrum of Cys-NAC disulfide determined by LC-MS with positive ESI mode
